# Supplementary material for: Direct biodiesel production from wet spent coffee grounds
Source: Royal Society of Chemistry journal article supplement (doi:10.1039/c9ra08038d), 2019-01-01
Supplement: c9ra08038d1.pdf [file c9ra08038d1.pdf]

## **SUPPLEMENTARY INFORMATION**

### **Direct biodiesel production from waste wet spent coffee ground**

Juliati Br. Tarigan <sup>a\*</sup>, Mimpin Ginting <sup>a</sup>, Siti Nurul Mubarakah <sup>b</sup>, Firman Sebayang <sup>a</sup>,  
Justaman Karo-karo <sup>c</sup>, Trung T. Nguyen <sup>d,e</sup>, Junedi Ginting <sup>f</sup>, Eko K. Sitepu <sup>a</sup>

<sup>1</sup> Department of Chemistry, Faculty of Mathematic and Natural Sciences, University of Sumatera Utara, Medan 20155, Indonesia.

<sup>2</sup> Medical Faculty, University of Islam Malang, Malang 65144, Indonesia.

<sup>3</sup> Balai Riset dan Standarisasi Industri, Kementerian Perindustrian, Medan 20214, Indonesia.

\*Correspondence author email: [juliati@usu.ac.id](mailto:juliati@usu.ac.id)

**Table 1.** ANOVA and Friedman ANOVA tests and Cochran-Bartlett and Tukey post hoc tests for C<sub>18:2</sub> and C<sub>18:1</sub> of RES-derived FAME samples of waste wet SCG. Significance Values below  $\alpha < 0.05$  are colour coded in red.

| Effect     | Univariate Tests of Significance for C18:2 (Spreadsheet1)<br>Sigma-restricted parameterization<br>Effective hypothesis decomposition |          |          |          |          |
|------------|--------------------------------------------------------------------------------------------------------------------------------------|----------|----------|----------|----------|
|            | SS                                                                                                                                   | Degr. of | MS       | F        | p        |
| Intercept  | 34411.23                                                                                                                             | 1        | 34411.23 | 462.8483 | 0.000000 |
| Ratio      | 934.52                                                                                                                               | 4        | 233.63   | 3.1424   | 0.022126 |
| Time       | 324.32                                                                                                                               | 4        | 81.08    | 1.0906   | 0.371378 |
| Ratio*Time | 1158.85                                                                                                                              | 16       | 72.43    | 0.9742   | 0.497425 |
| Error      | 3717.33                                                                                                                              | 50       | 74.35    |          |          |

| Effect    | Univariate Tests of Significance for C18:2 (Spreadsheet9)<br>Sigma-restricted parameterization<br>Effective hypothesis decomposition |          |          |          |          |
|-----------|--------------------------------------------------------------------------------------------------------------------------------------|----------|----------|----------|----------|
|           | SS                                                                                                                                   | Degr. of | MS       | F        | p        |
| Intercept | 3960.100                                                                                                                             | 1        | 3960.100 | 394.0398 | 0.000006 |
| Cat Conc  | 84.150                                                                                                                               | 4        | 21.038   | 2.0933   | 0.219270 |
| Error     | 50.250                                                                                                                               | 5        | 10.050   |          |          |

| Effect    | Univariate Tests of Significance for C18:2 (Spreadsheet25)<br>Sigma-restricted parameterization<br>Effective hypothesis decomposition |          |          |          |          |
|-----------|---------------------------------------------------------------------------------------------------------------------------------------|----------|----------|----------|----------|
|           | SS                                                                                                                                    | Degr. of | MS       | F        | p        |
| Intercept | 4708.900                                                                                                                              | 1        | 4708.900 | 1192.127 | 0.000000 |
| Time      | 0.350                                                                                                                                 | 4        | 0.087    | 0.022    | 0.998696 |
| Error     | 19.750                                                                                                                                | 5        | 3.950    |          |          |

| Effect     | Univariate Tests of Significance for C18:1 (Spreadsheet1)<br>Sigma-restricted parameterization<br>Effective hypothesis decomposition |          |          |          |          |
|------------|--------------------------------------------------------------------------------------------------------------------------------------|----------|----------|----------|----------|
|            | SS                                                                                                                                   | Degr. of | MS       | F        | p        |
| Intercept  | 112762.5                                                                                                                             | 1        | 112762.5 | 448.3767 | 0.000000 |
| Ratio      | 5051.7                                                                                                                               | 4        | 1262.9   | 5.0217   | 0.001759 |
| Time       | 594.5                                                                                                                                | 4        | 148.6    | 0.5910   | 0.670719 |
| Ratio*Time | 2782.0                                                                                                                               | 16       | 173.9    | 0.6914   | 0.788535 |
| Error      | 12574.5                                                                                                                              | 50       | 251.5    |          |          |

| Effect    | Univariate Tests of Significance for C18:1 (Spreadsheet9)<br>Sigma-restricted parameterization<br>Effective hypothesis decomposition |          |          |          |          |
|-----------|--------------------------------------------------------------------------------------------------------------------------------------|----------|----------|----------|----------|
|           | SS                                                                                                                                   | Degr. of | MS       | F        | p        |
| Intercept | 16180.51                                                                                                                             | 1        | 16180.51 | 125.4485 | 0.000099 |
| Cat Conc  | 907.40                                                                                                                               | 4        | 226.85   | 1.7588   | 0.273827 |
| Error     | 644.91                                                                                                                               | 5        | 128.98   |          |          |

| Effect    | Univariate Tests of Significance for C18:1 (Spreadsheet25)<br>Sigma-restricted parameterization<br>Effective hypothesis decomposition |          |          |          |          |
|-----------|---------------------------------------------------------------------------------------------------------------------------------------|----------|----------|----------|----------|
|           | SS                                                                                                                                    | Degr. of | MS       | F        | p        |
| Intercept | 8136.756                                                                                                                              | 1        | 8136.756 | 1380.574 | 0.000000 |
| Time      | 5.087                                                                                                                                 | 4        | 1.272    | 0.216    | 0.918740 |
| Error     | 29.469                                                                                                                                | 5        | 5.894    |          |          |

| Tests of Homogeneity of Variances (Spreadsheet1) |         |          |          |    |          |
|--------------------------------------------------|---------|----------|----------|----|----------|
| Effect: Ratio*Time                               |         |          |          |    |          |
|                                                  | Hartley | Cochran  | Bartlett | df | p        |
| C18:2                                            |         | 0.489643 | 111.9733 | 20 | 0.000000 |

| Tests of Homogeneity of Variances (Spreadsheet9) |         |          |          |    |          |
|--------------------------------------------------|---------|----------|----------|----|----------|
| Effect: "Catayst Concentration"                  |         |          |          |    |          |
|                                                  | Hartley | Cochran  | Bartlett | df | p        |
| C18:2                                            |         | 0.898010 | 4.721905 | 3  | 0.193331 |

| Tests of Homogeneity of Variances (Spreadsheet25) |          |          |          |    |          |
|---------------------------------------------------|----------|----------|----------|----|----------|
| Effect: Time                                      |          |          |          |    |          |
|                                                   | Hartley  | Cochran  | Bartlett | df | p        |
| C18:2                                             | 1.440000 | 0.227848 | 0.055341 | 4  | 0.999624 |

| Tests of Homogeneity of Variances (Spreadsheet1) |          |          |          |    |      |
|--------------------------------------------------|----------|----------|----------|----|------|
| Effect: Ratio*Time                               |          |          |          |    |      |
|                                                  | Hartley  | Cochran  | Bartlett | df | p    |
| C18:1                                            | 32467.00 | 0.322746 | 157.3177 | 24 | 0.00 |

| Tests of Homogeneity of Variances (Spreadsheet9) |          |          |          |    |          |
|--------------------------------------------------|----------|----------|----------|----|----------|
| Effect: "Catayst Concentration"                  |          |          |          |    |          |
|                                                  | Hartley  | Cochran  | Bartlett | df | p        |
| C18:1                                            | 16641.00 | 0.806367 | 14.57303 | 4  | 0.005674 |

| Tests of Homogeneity of Variances (Spreadsheet25) |          |          |          |    |          |
|---------------------------------------------------|----------|----------|----------|----|----------|
| Effect: Time                                      |          |          |          |    |          |
|                                                   | Hartley  | Cochran  | Bartlett | df | p        |
| C18:1                                             | 361.0000 | 0.382821 | 3.387726 | 4  | 0.495154 |



| Tukey HSD test; variable C18:2 (Spreadsheet9) |          |          |          |          |          |          |
|-----------------------------------------------|----------|----------|----------|----------|----------|----------|
| Approximate Probabilities for Post Hoc Tests  |          |          |          |          |          |          |
| Error: Between MS = 10.050, df = 5.0000       |          |          |          |          |          |          |
| Cell No.                                      | Cat Conc | {1}      | {2}      | {3}      | {4}      | {5}      |
| 1                                             | 1        |          | 0.455479 | 0.361480 | 0.999076 | 1.000000 |
| 2                                             | 3        | 0.455479 |          | 0.999076 | 0.564673 | 0.455479 |
| 3                                             | 5        | 0.361480 | 0.999076 |          | 0.455479 | 0.361480 |
| 4                                             | 7        | 0.999076 | 0.564673 | 0.455479 |          | 0.999076 |
| 5                                             | 9        | 1.000000 | 0.455479 | 0.361480 | 0.999076 |          |

| Tukey HSD test; variable C18:2 (Spreadsheet25) |      |          |          |          |          |          |
|------------------------------------------------|------|----------|----------|----------|----------|----------|
| Approximate Probabilities for Post Hoc Tests   |      |          |          |          |          |          |
| Error: Between MS = 3.9500, df = 5.0000        |      |          |          |          |          |          |
| Cell No.                                       | Time | {1}      | {2}      | {3}      | {4}      | {5}      |
| 1                                              | 30   |          | 0.999924 | 0.999924 | 1.000000 | 0.999924 |
| 2                                              | 45   | 0.999924 |          | 1.000000 | 0.999924 | 0.998825 |
| 3                                              | 60   | 0.999924 | 1.000000 |          | 0.999924 | 0.998825 |
| 4                                              | 75   | 1.000000 | 0.999924 | 0.999924 |          | 0.999924 |
| 5                                              | 90   | 0.999924 | 0.998825 | 0.998825 | 0.999924 |          |

| Tukey HSD test; variable C18:1 (Spreadsheet9) |          |          |          |          |          |          |
|-----------------------------------------------|----------|----------|----------|----------|----------|----------|
| Approximate Probabilities for Post Hoc Tests  |          |          |          |          |          |          |
| Error: Between MS = 128.98, df = 5.0000       |          |          |          |          |          |          |
| Cell No.                                      | Cat Conc | {1}      | {2}      | {3}      | {4}      | {5}      |
| 1                                             | 1        |          | 0.459252 | 0.346948 | 0.998580 | 0.966117 |
| 2                                             | 3        | 0.459252 |          | 0.998043 | 0.582448 | 0.759000 |
| 3                                             | 5        | 0.346948 | 0.998043 |          | 0.449774 | 0.615278 |
| 4                                             | 7        | 0.998580 | 0.582448 | 0.449774 |          | 0.995626 |
| 5                                             | 9        | 0.966117 | 0.759000 | 0.615278 | 0.995626 |          |

| Tukey HSD test; variable C18:1 (Spreadsheet25) |      |          |          |          |          |          |
|------------------------------------------------|------|----------|----------|----------|----------|----------|
| Approximate Probabilities for Post Hoc Tests   |      |          |          |          |          |          |
| Error: Between MS = 5.8937, df = 5.0000        |      |          |          |          |          |          |
| Cell No.                                       | Time | {1}      | {2}      | {3}      | {4}      | {5}      |
| 1                                              | 30   |          | 0.999827 | 0.912482 | 0.999827 | 0.999966 |
| 2                                              | 45   | 0.999827 |          | 0.955160 | 1.000000 | 0.999998 |
| 3                                              | 60   | 0.912482 | 0.955160 |          | 0.955160 | 0.942716 |
| 4                                              | 75   | 0.999827 | 1.000000 | 0.955160 |          | 0.999998 |
| 5                                              | 90   | 0.999966 | 0.999998 | 0.942716 | 0.999998 |          |
